# Supplementary material for: Field verification of low-level biochar applications as effective ameliorants to mitigate cadmium accumulation into Brassica campestris L from polluted soils
Source: Frontiers journal article supplement (doi:10.3389/fenvs.2022.1114335), 2023-01-16
Supplement: Data_Sheet_1.docx [file Data_Sheet_1.docx]

**Supplementary materials**

**1 Set-up of Cd2+ adsorption experiment**

The characterization of Cd adsorption capacity of three biochars was conducted in the laboratory. In brief, the biochar was mixed with Cd(NO3)2 solution at the ratio of 50 mg : 5 mL, and shaken at 25 °C at 150 rpm for 48 hours. Thereafter the suspensions were passed through 0.22 µm filters, and the concentrations of Cd2+ ion measured by the ICP-OES. The initial concentrations of Cd2+ were 0 mg/L, 25 mg/L, 50 mg/L, 100 mg/L, 150 mg/L, 200 mg/L, 250 mg/L, and 500 mg/L, respectively, and the initial solution pH were set to 5.0±0.2. In some treatments, the initial solution pH was set to 3.0±0.2 or 4.0±0.2. Metal adsorption onto biochars was fitted using Langmiur and Freundlich isotherm.

**2 Quality control of ICP-MS analysis**

The concentration of Cd in the supernatant for Cd availability test and the digestate of plant samples were analyzed using an inductively coupled plasma mass spectrometry (ICP-MS 7500cx; Agilent Inc.). A serial of Cd standard solution (0.5 μg/L - 100 μg/L) were prepared and tested as calibration solutions, and the R2 of calibration curve for Cd examination were ranged from 0.9998 to 1.0000. 103Rh solution was added as internal standard, and the recovery for internal standard ranged from 96.8% to 109%. Relative standard deviations (RSDs) of raw intensity during measurement were ranged from 1.02% to 4.32%. Continuous calibration blank (CCB) during the measurement were less than 0.1 μg/L, and the recovery of Continuous calibration verification (CCV) were ranged from 96.8% to 101.6%.

**Table S1** **Fitted isotherms for Cd2+ adsorption onto three biochars**

|  | **Langmuir isotherm** | | | **Freundlich isotherm** | | |
| --- | --- | --- | --- | --- | --- | --- |
| ***Q0***  **(mg/g)** | ***b*** | **R2** | ***Kf***  **(mg/g)** | *1/n* | R2 |
| PMB | 33.3 | 0.02 | 0.86 | 2.74 | 0.43 | 0.94 |
| RSB | 43.5 | 0.14 | 0.95 | 8.55 | 0.34 | 0.93 |
| RHB | 24.4 | 0.007 | 0.90 | 0.37 | 0.68 | 0.93 |

**Table S2 Relationship among concentrations of soil available Cd and Cd accumulation in plants**

| **Amendment** | **Relationship** |
| --- | --- |
| PMB | Cedible=21.9× Csoil+268 (R2=0.995, p<0.05) |
|  | Croot=17.0× Csoil+380 (R2=0.985, p=0.077) |
|  | Cedible=1.26× Croot-202 (R2=0.964, p=0.121) |
| RSB | Cedible=32.3× Csoil+40.9 (R2=0.978, p=0.096) |
|  | Croot=33.7× Csoil+18.0 (R2=0.995, p<0.05) |
|  | Cedible=0.97× Croot+20.5 (R2=0.992, p=0.059) |
| RHB | Cedible=19.8× Csoil+313 (R2=0.972, p=0.106) |
|  | Croot=44.2× Csoil-203 (R2=0.692, p=0.375) |
|  | Cedible=0.28× Croot+514 (R2=0.530, p=0.481) |


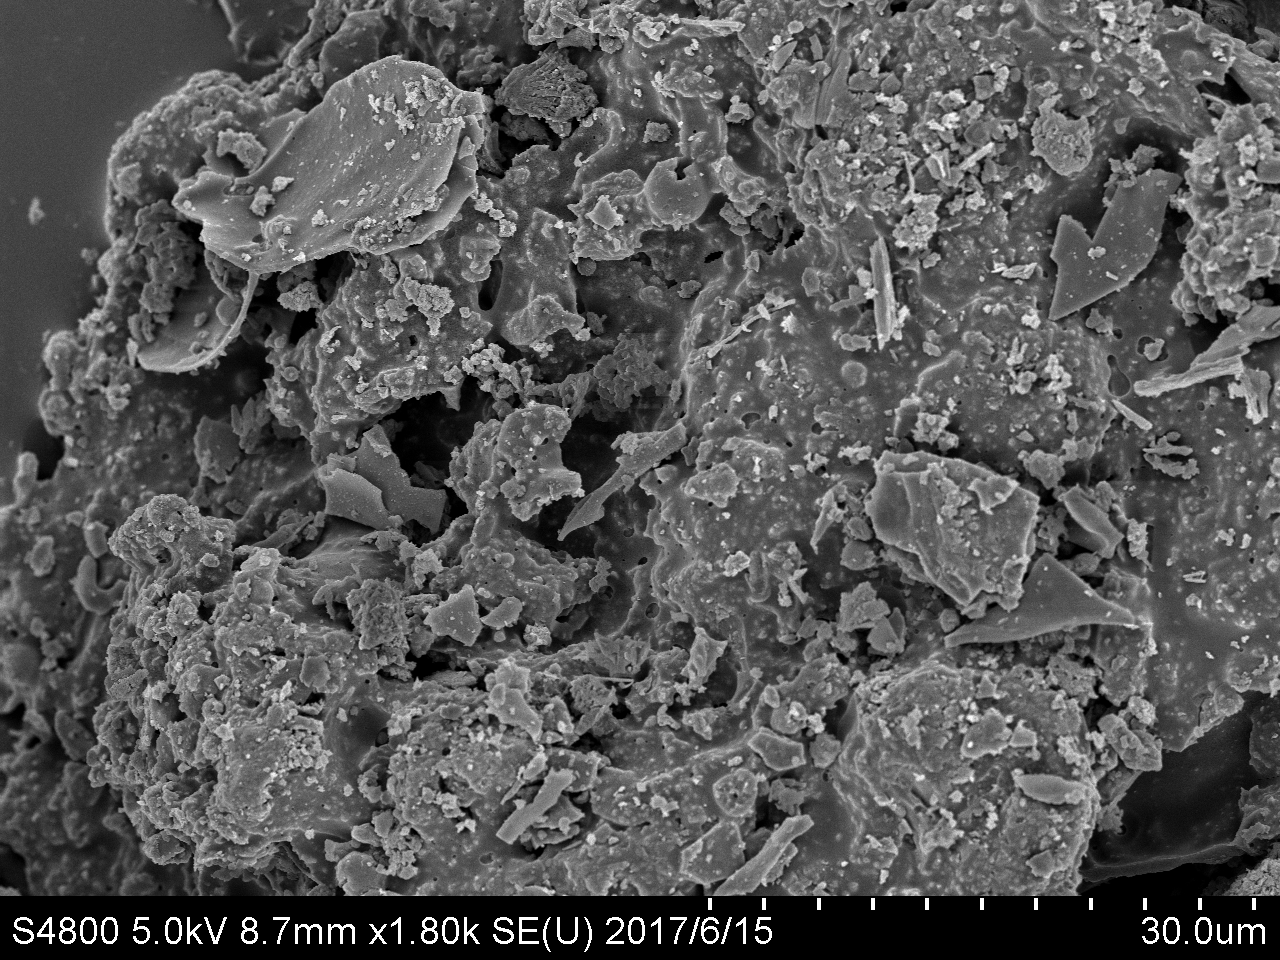

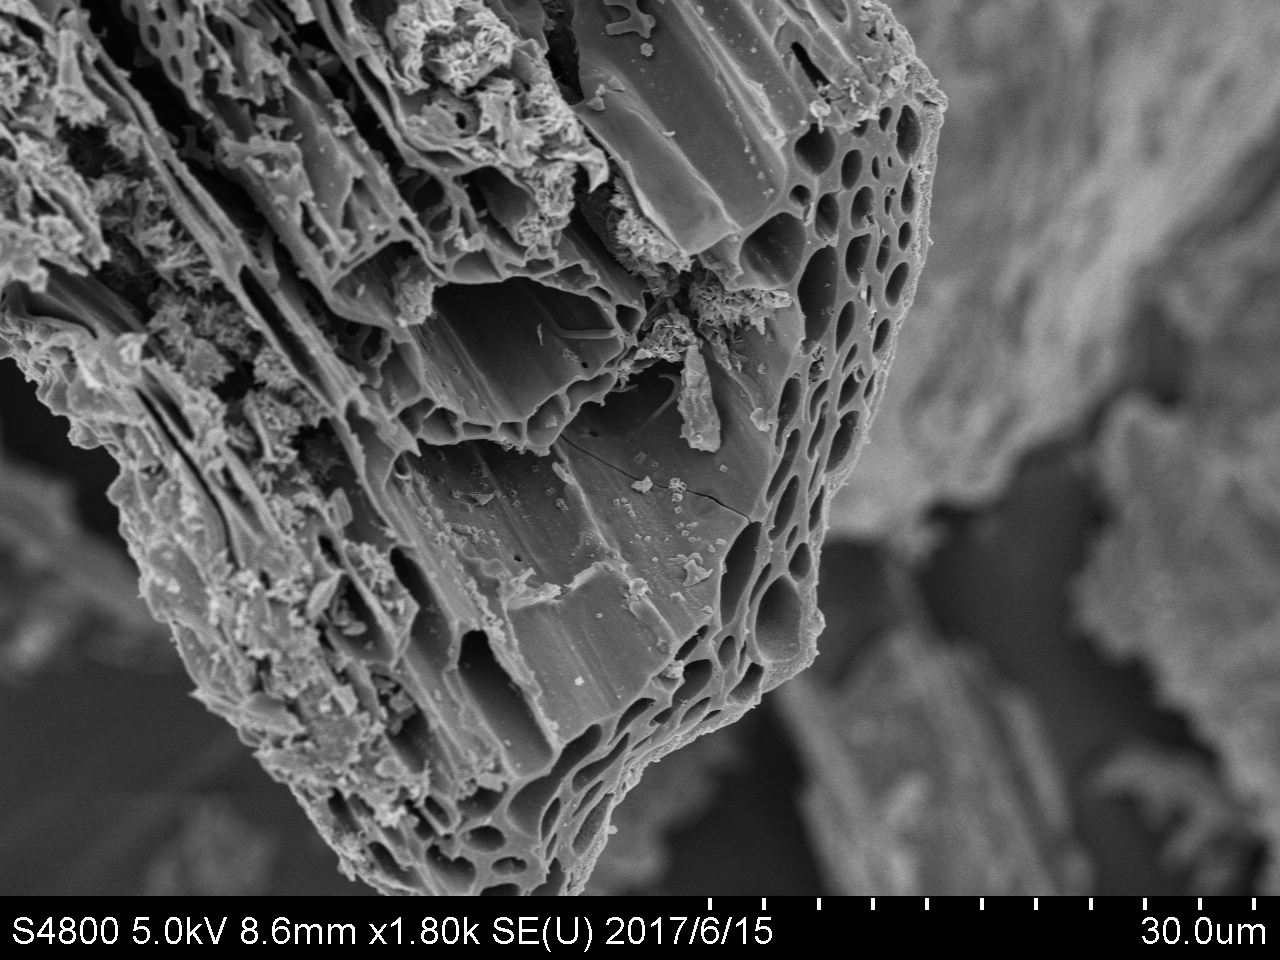

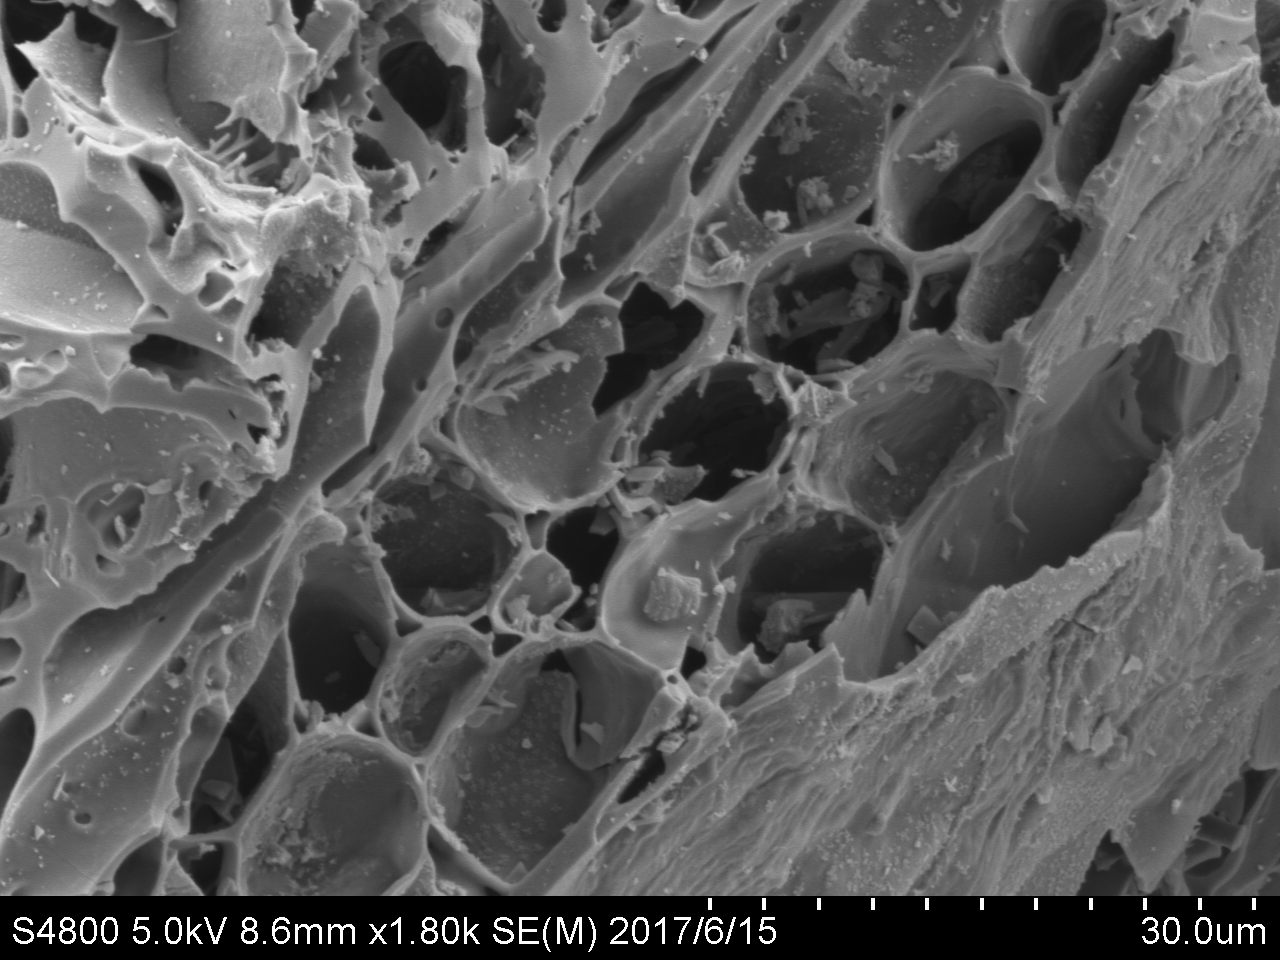


**Figure S1 The SEM image of three biochars. Top left, PMB; Top right, RSB; Bottom left, RHB.**

**
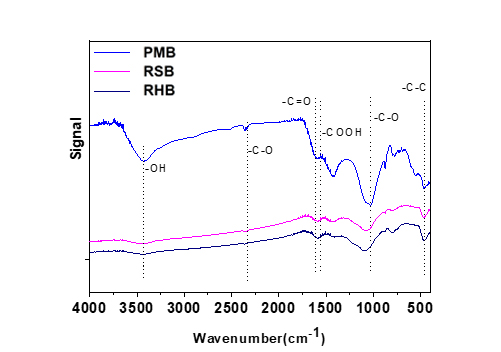
**

**Figure S2 Infrared spectra of PMB, RSB and RHB.**

**
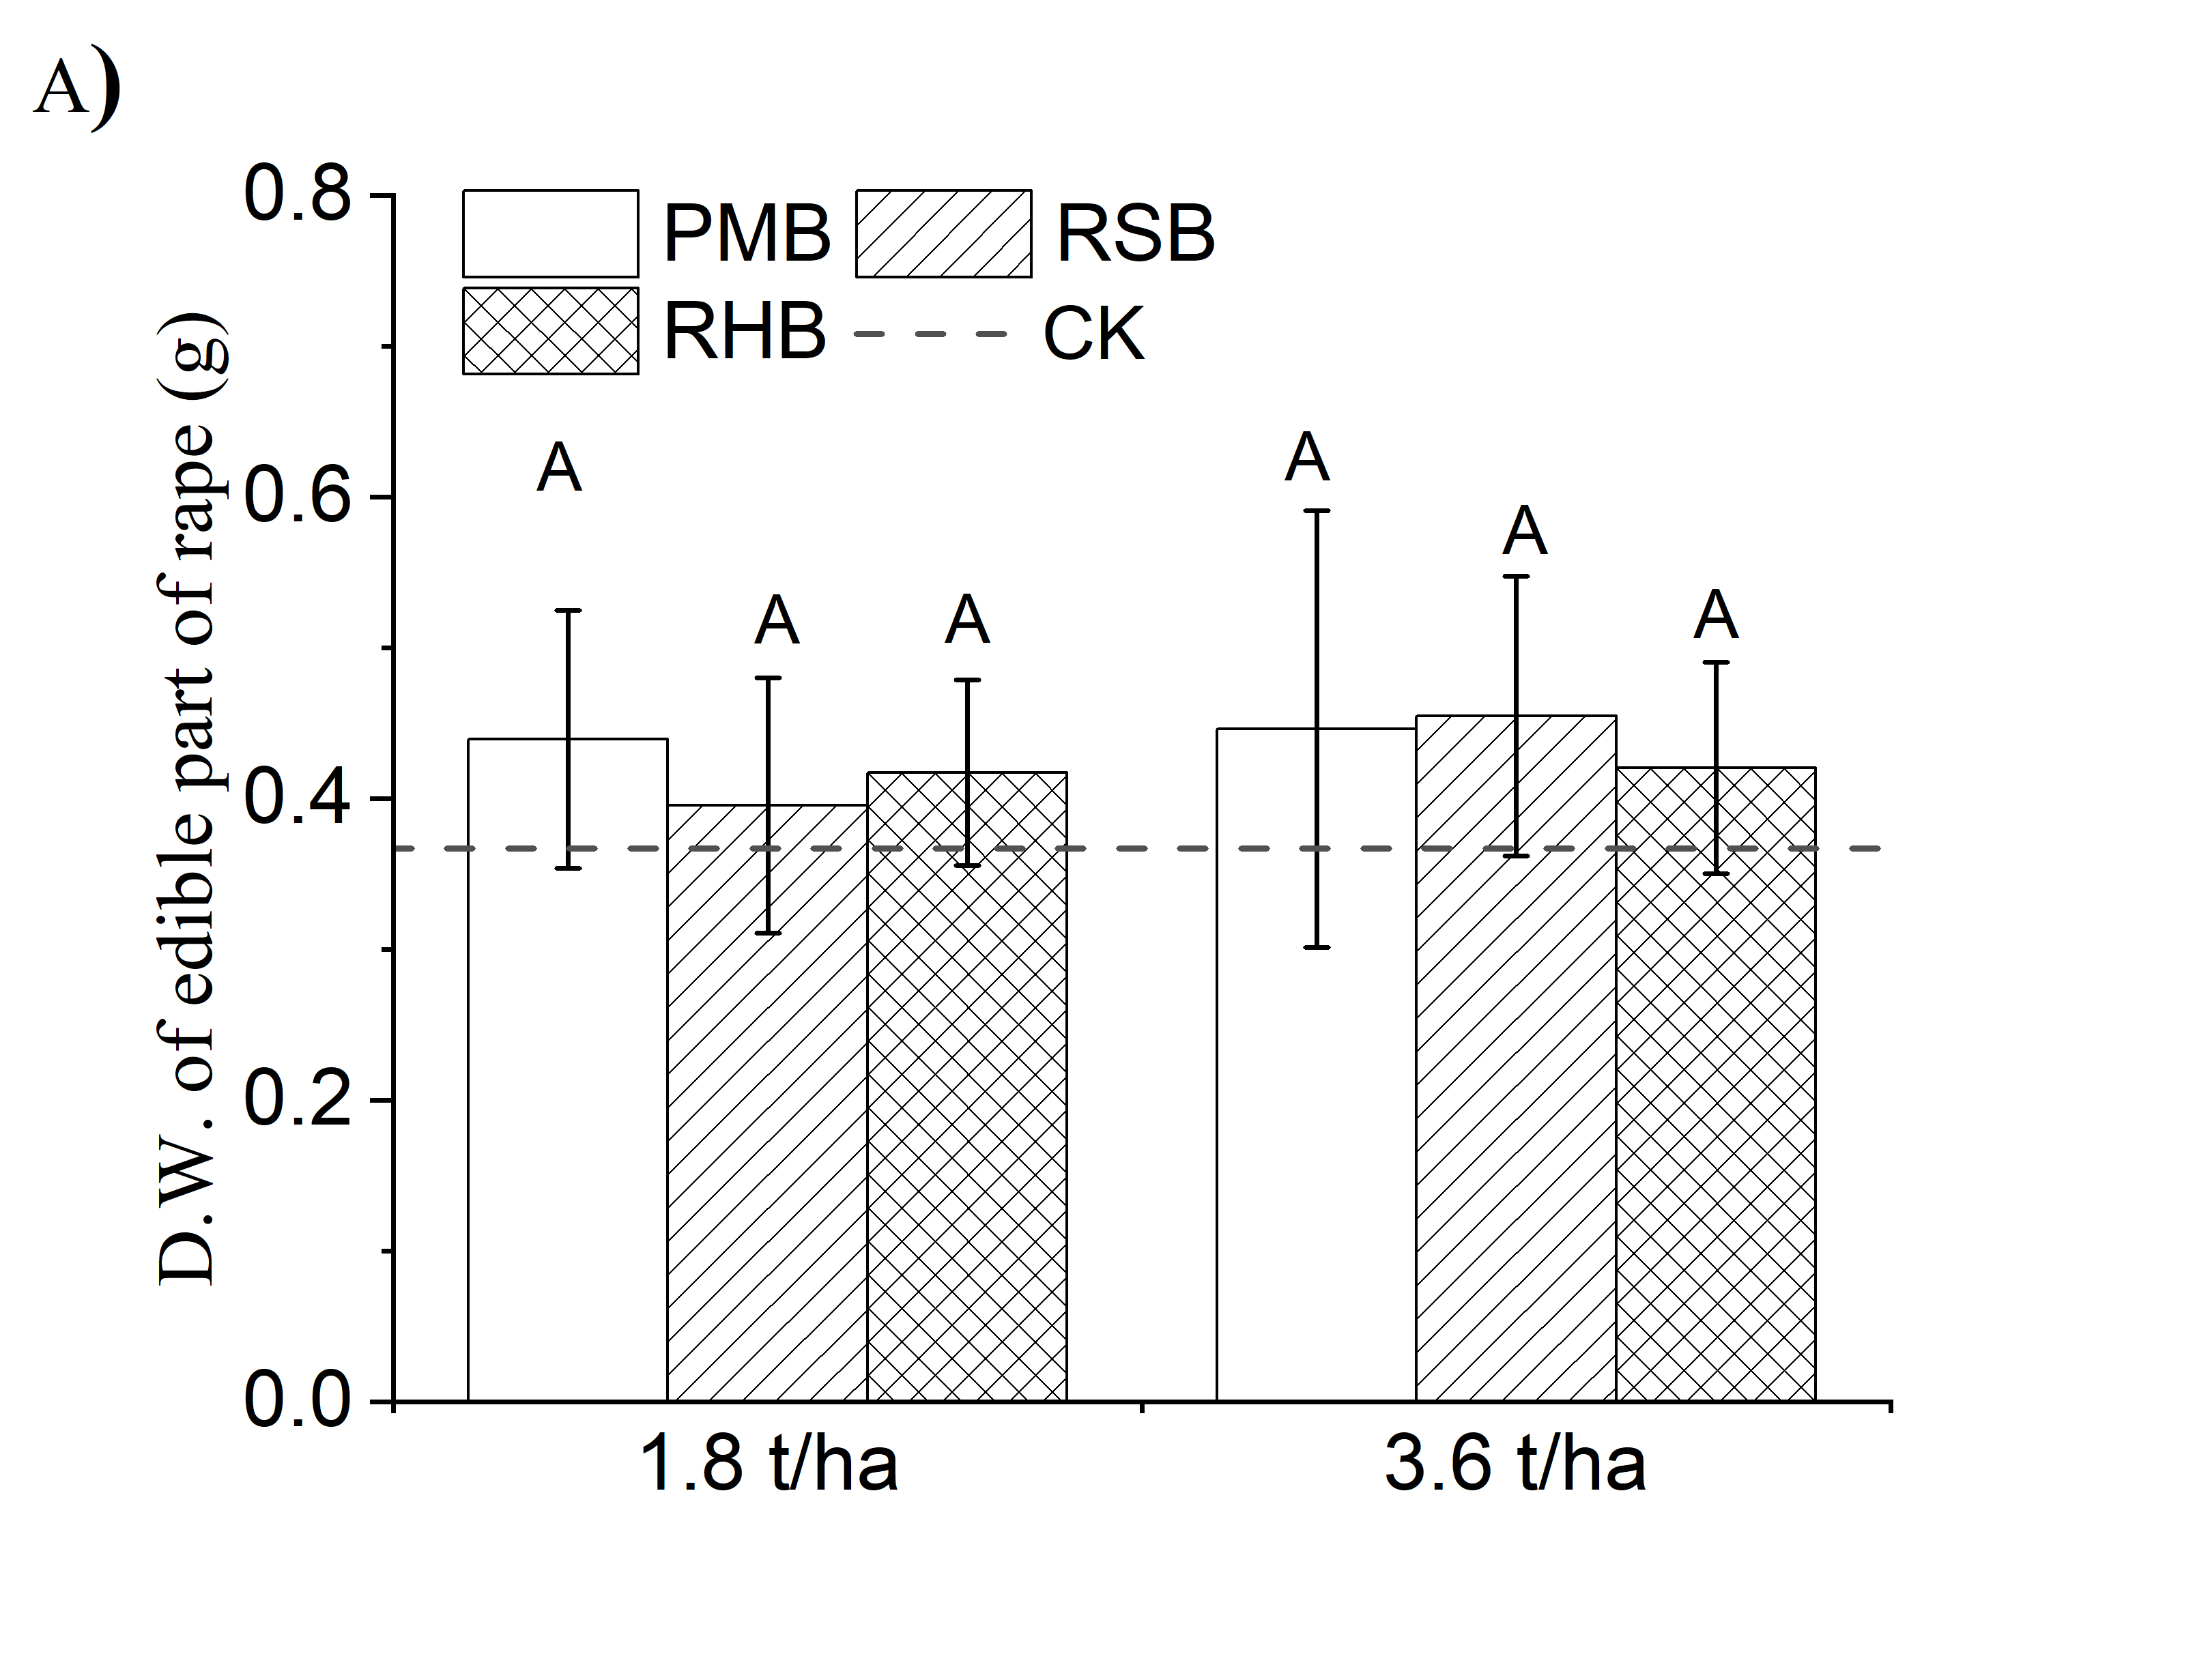

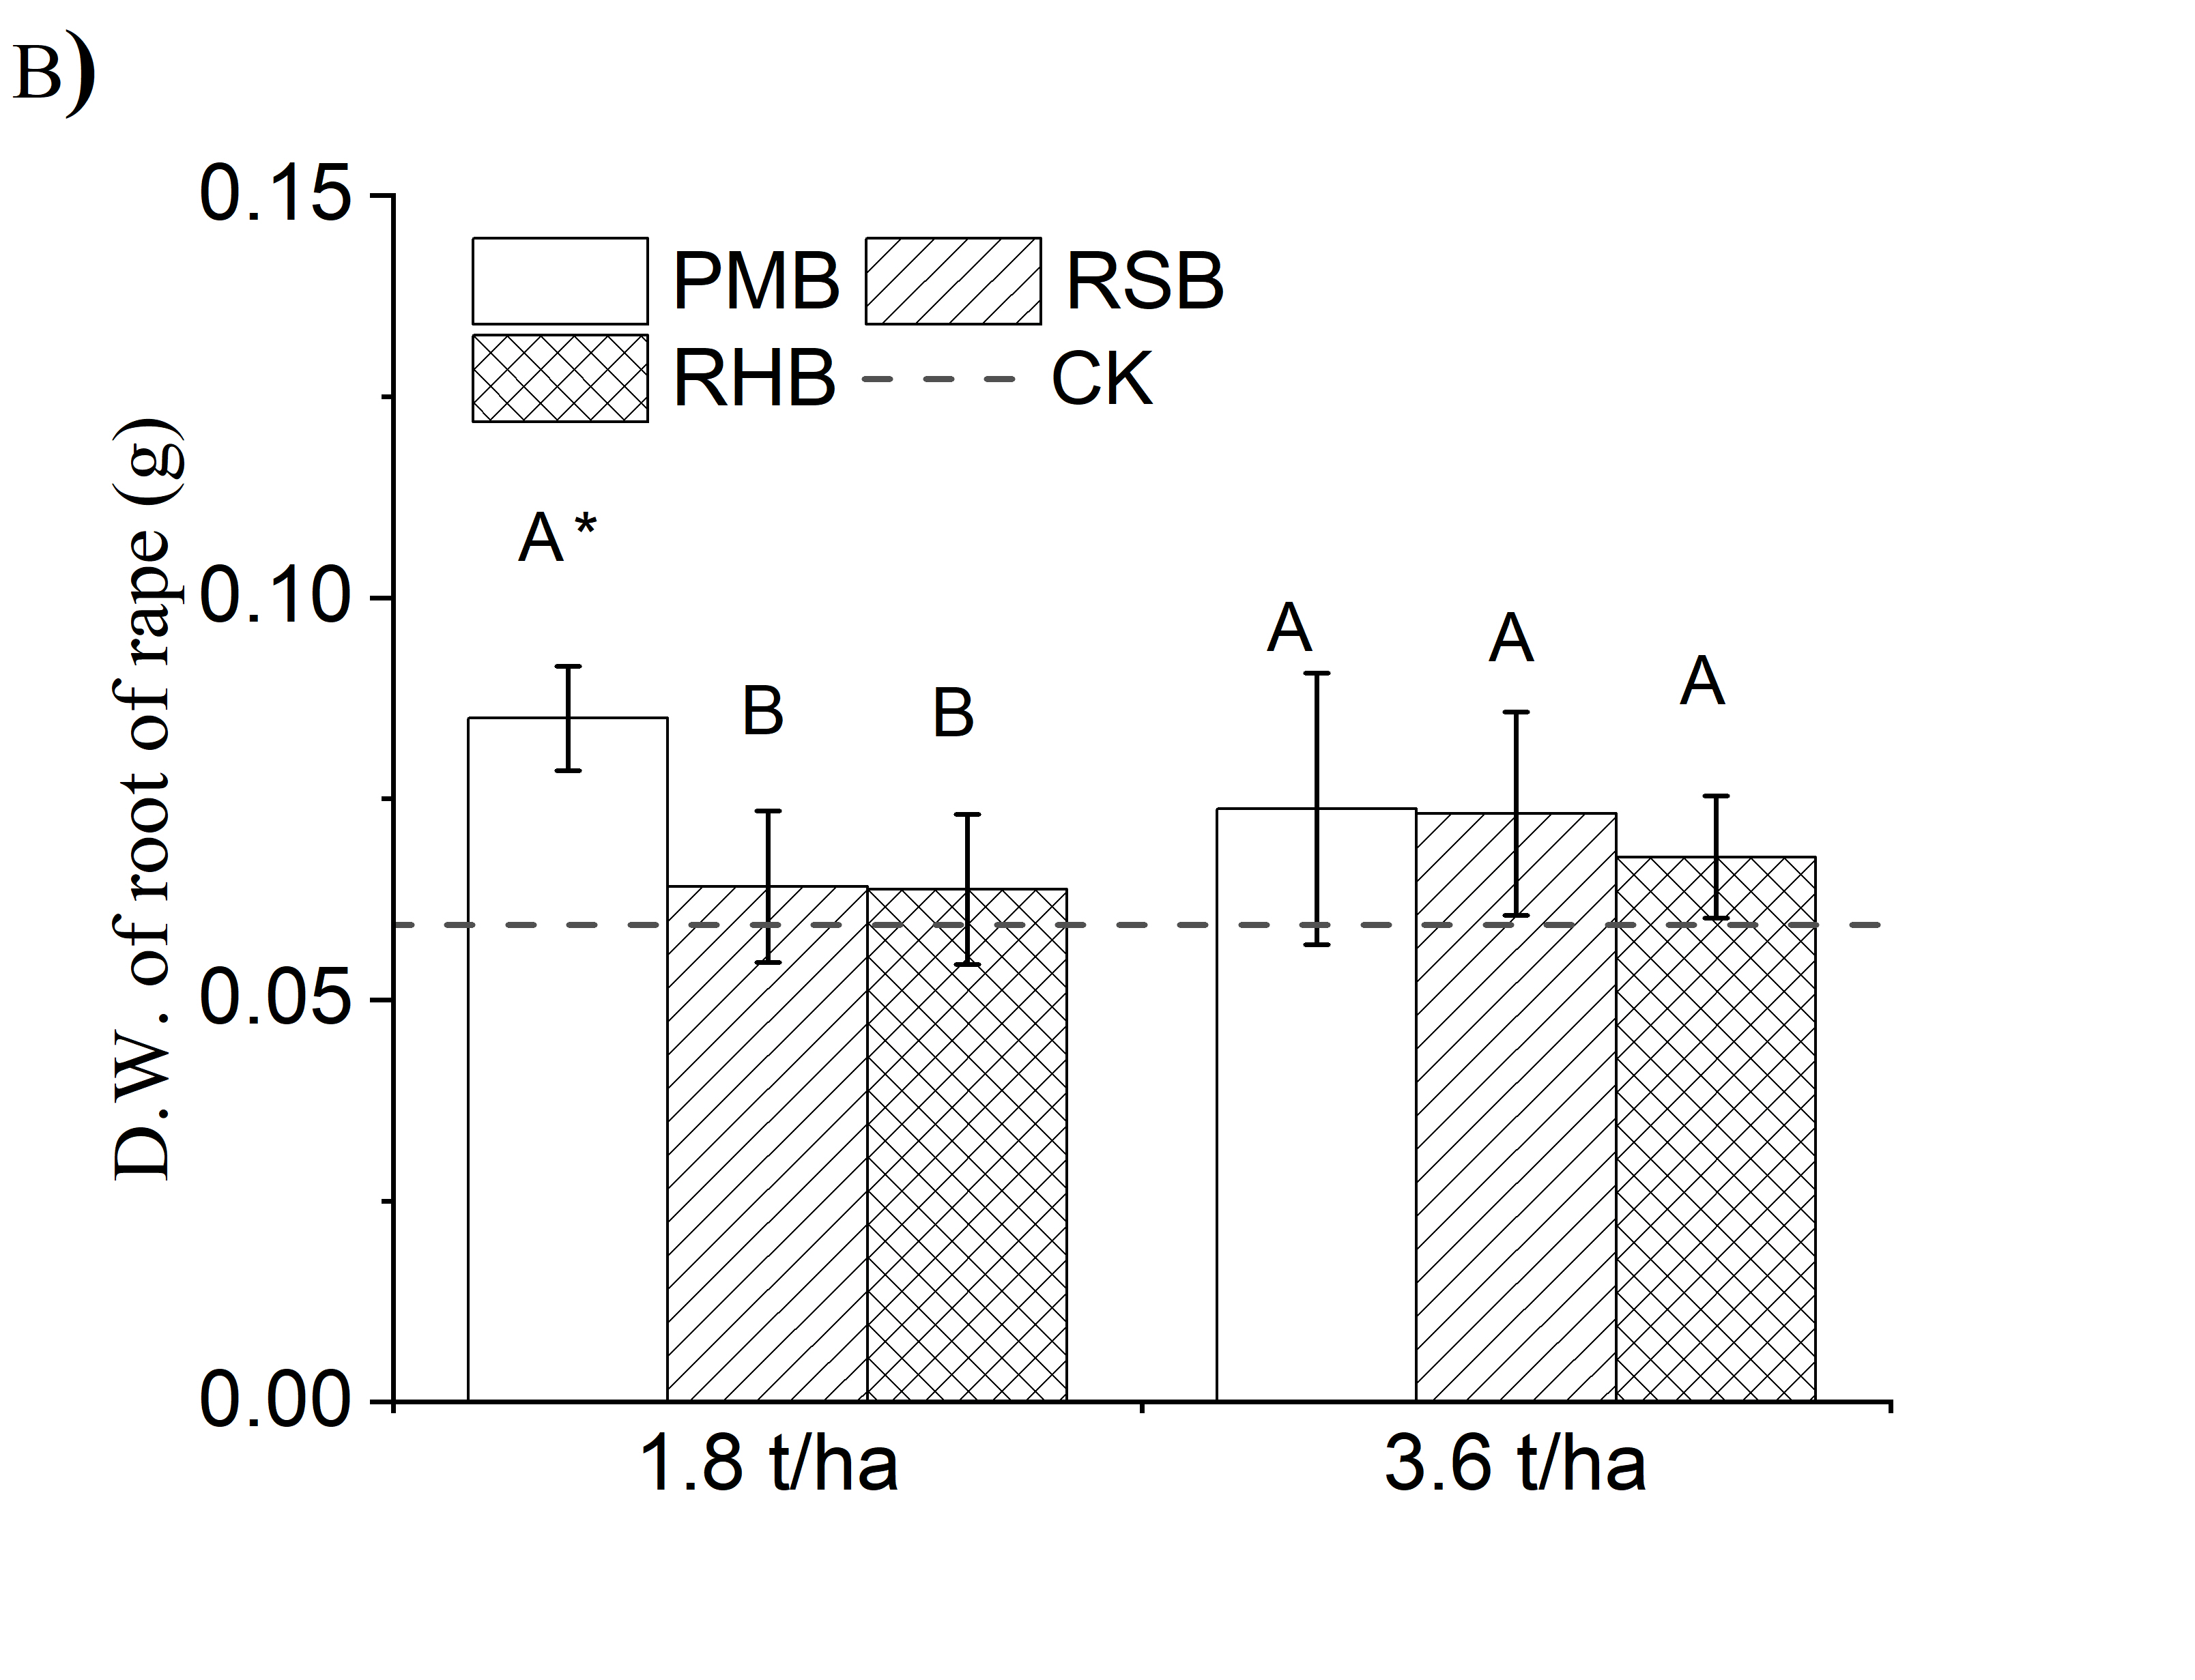
**

**Figure S3 Dry weight of edible parts (A) and roots (B) of rape plants grown in soil and soil amended with biochars. “*” indicates a value to be significantly different to the control (CK) value (p < 0.05).**





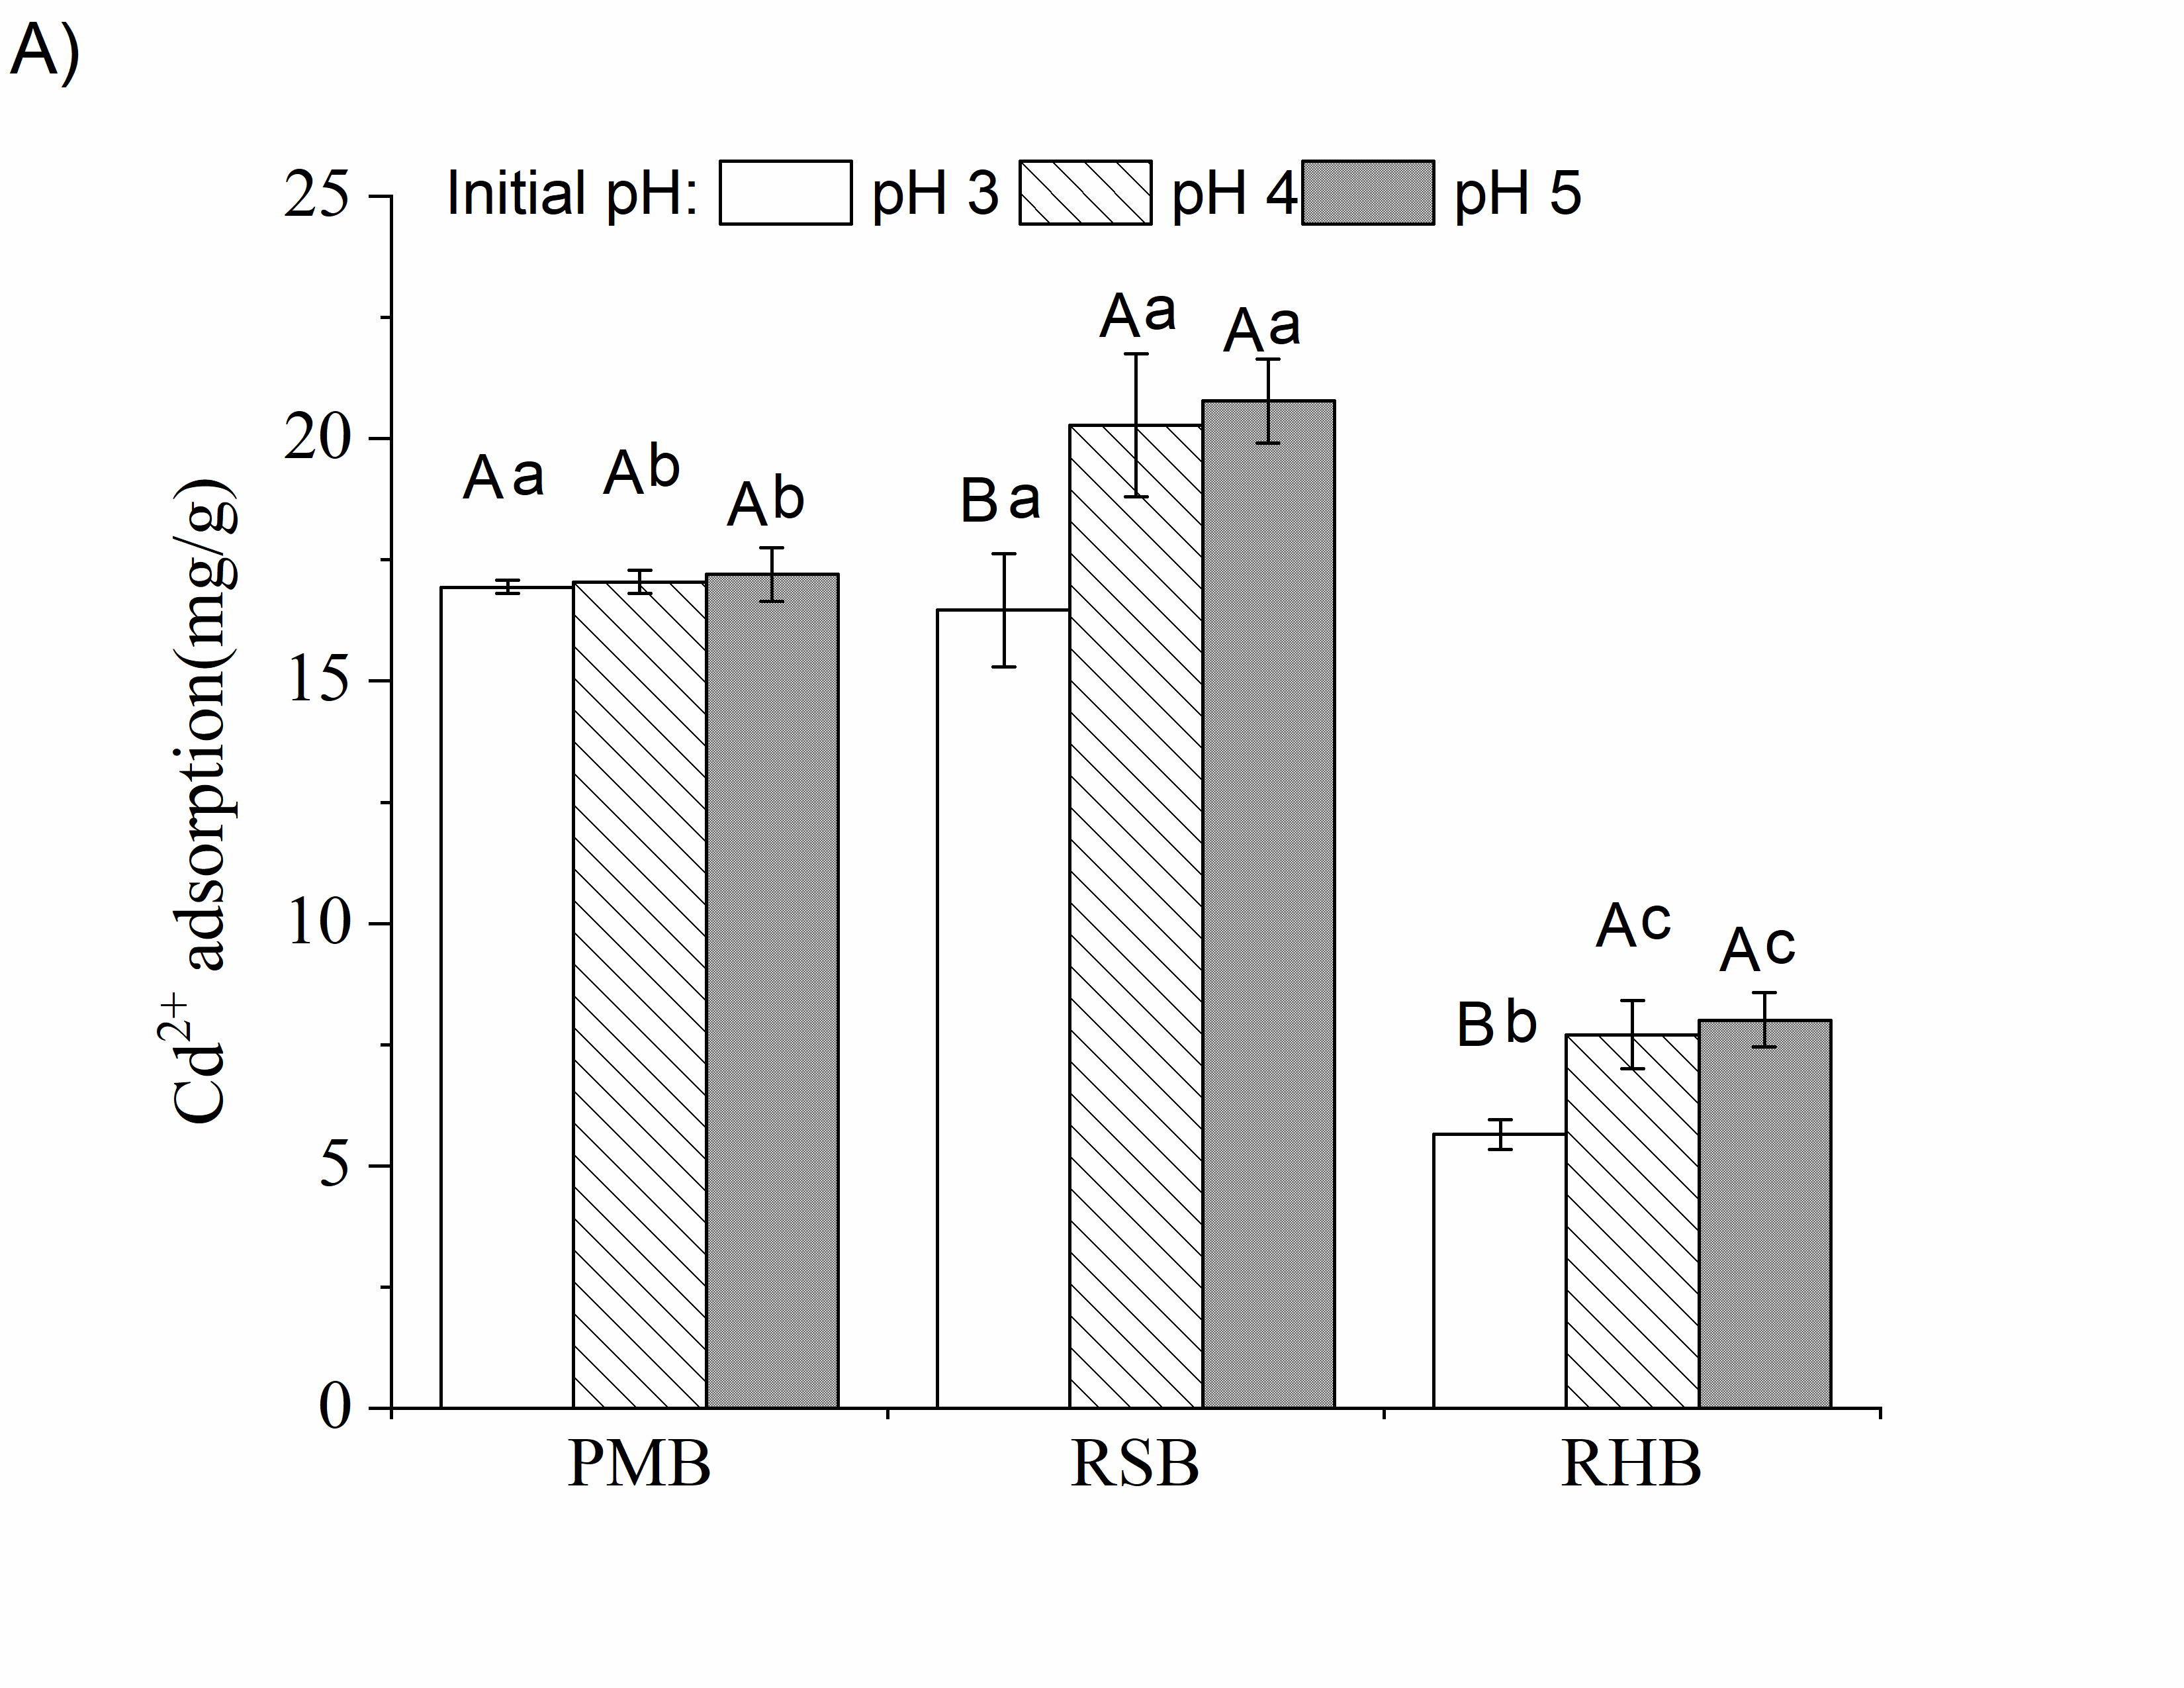


**Figure S4 Cd adsorption (A) and final pH (B) of batch equilibrium experiments where initial pH was 3, 4 and 5. Uppercase letters indicated significantly (p < 0.05) different final pH for a given biochar where initial pH was different; lowercase letters indicate significantly (p < 0.05) different final pH between biochars where the initial pH was the same.**

**References**

Liu, Y., He, Z., Uchimiya, M. (2015). Comparison of biochar formation from various agricultural by-products using FTIR spectroscopy. *Modern Applied Science*, 9(4): 246. https://doi:10.5539/mas.v9n4p246.

Singh, B., Fang, Y., Johnston, C.T. (2016). A fourier-transform infrared study of biochar aging in soils. *Soil Science Society of America Journal*, 80(3): 613.

https://doi:10.2136/sssaj2015.11.0414.

Zolfi Bavariani, M., Ronaghi, A., Ghasemi, R. (2019). Influence of pyrolysis temperatures on FTIR analysis, nutrient bioavailability, and agricultural use of poultry manure biochars. *Communications in Soil Science and Plant Analysis*, 50(4): 402-411.https:// doi:10.1080/00103624.2018.1563101.
